# Supplementary material for: A Novel, Rapid Screening Technique for Sugar Syrup Adulteration in Honey Using Fluorescence Spectroscopy
Source: MDPI journal article supplement (doi:10.3390/foods11152316), 2022-08-03
Supplement: s1 [file s1]

# **A Novel, Rapid Screening Technique for Sugar Syrup Adulteration in Honey using Fluorescence Spectroscopy**

**Sha Yan<sup>1, 2</sup>, Minghui Sun<sup>2</sup>, Xuan Wang<sup>2</sup>, Jihao Shan<sup>3</sup>, Xiaofeng Xue<sup>b, \*</sup>**

<sup>1</sup> *College of Food Science and Engineering, Shanxi Agricultural University, Taigu 030801, China*

<sup>2</sup> *Institute of Apiculture Research, Chinese Academy of Agricultural Sciences, Beijing 100093, China*

<sup>3</sup> *Institute of Agro-Products Processing Science and Technology, Chinese Academy of Agricultural Sciences, Beijing 100081, China*

\* Corresponding author. Tel./fax: +86 10 62594643

E-mail addresses: xue\_xiaofeng@126.com (X. F. Xue)

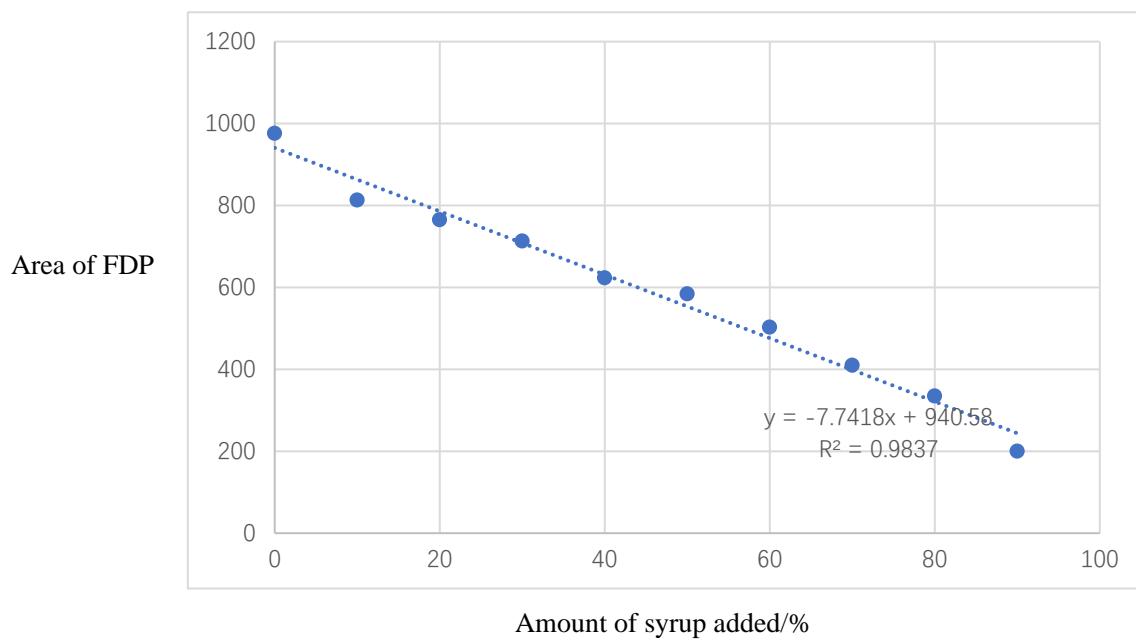

**Figure S1.** The relationship of amount of syrup added and area of FDP

**Table S1.** Fluorescence Spectra Information of acacia honey samples

| Source   | Collection time | Fluorescence emission spectra |                 | FDP               |
|----------|-----------------|-------------------------------|-----------------|-------------------|
|          |                 | Apex (nm)                     | Area $\pm$ RSD  | Area $\pm$ RSD    |
| Beijing  | 2019.06         | 470 $\pm$ 5                   | 1899 $\pm$ 43.3 | 1086 $\pm$ 33.6 a |
|          | 2020.05         | 470 $\pm$ 3                   | 1876 $\pm$ 30.2 | 1104 $\pm$ 25.8 a |
|          | 2020.06         | 470 $\pm$ 5                   | 1920 $\pm$ 41.9 | 1072 $\pm$ 30.9 a |
| Shannxi  | 2019.06         | 470 $\pm$ 3                   | 1893 $\pm$ 36.3 | 1181 $\pm$ 32.0 a |
|          | 2020.06         | 470 $\pm$ 5                   | 1852 $\pm$ 48.1 | 1207 $\pm$ 16.7 a |
|          | 2021.06         | 470 $\pm$ 4                   | 1901 $\pm$ 31.5 | 1226 $\pm$ 39.3 a |
| Shandong | 2019.06         | 470 $\pm$ 5                   | 1871 $\pm$ 50.6 | 1291 $\pm$ 40.1 a |
|          | 2020.06         | 470 $\pm$ 5                   | 1876 $\pm$ 20.9 | 1208 $\pm$ 26.4 a |
|          | 2021.06         | 470 $\pm$ 6                   | 1921 $\pm$ 53.6 | 1200 $\pm$ 38.8 a |

Note: Lowercase letters indicate significant difference ( $p < 0.05$ )

**Table S2** The comparison of fluorescence spectra information from 3 different manufacturers

| Manufacturer       | Fluorescence emission spectra |                                      | FDP                                  |
|--------------------|-------------------------------|--------------------------------------|--------------------------------------|
|                    | Apex (nm)                     | Area ratio (Acacia honey/Beet syrup) | Area ratio (Acacia honey/Beet syrup) |
| Hitachi F-4500     | 470 ± 3nm (Acacia honey)      | 0.58                                 | 32                                   |
|                    | 448 ± 4nm (Beet syrup)        |                                      |                                      |
| Shimadzu RF-5301PC | 470 ± 3nm (Acacia honey)      | 0.60                                 | 32                                   |
|                    | 448 ± 4nm (Beet syrup)        |                                      |                                      |
| Lingguang F97      | 470 ± 3nm (Acacia honey)      | 0.58                                 | 31.5                                 |
|                    | 448 ± 4nm (Beet syrup)        |                                      |                                      |
